# Supplementary material
Source: PubMed Central journal article supplement (PMC4825598)
Supplement: kccy-14-19-1078020-s001.pdf [file kccy-14-19-1078020-s001.pdf]

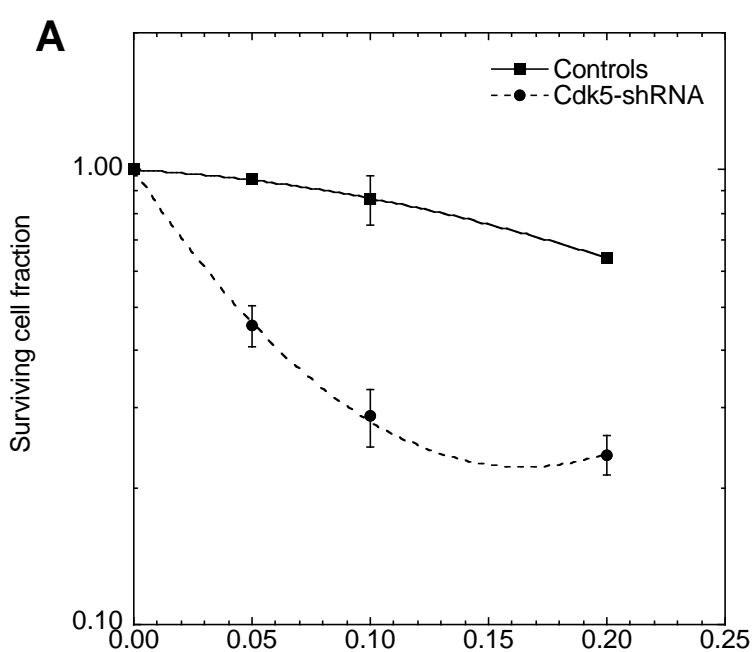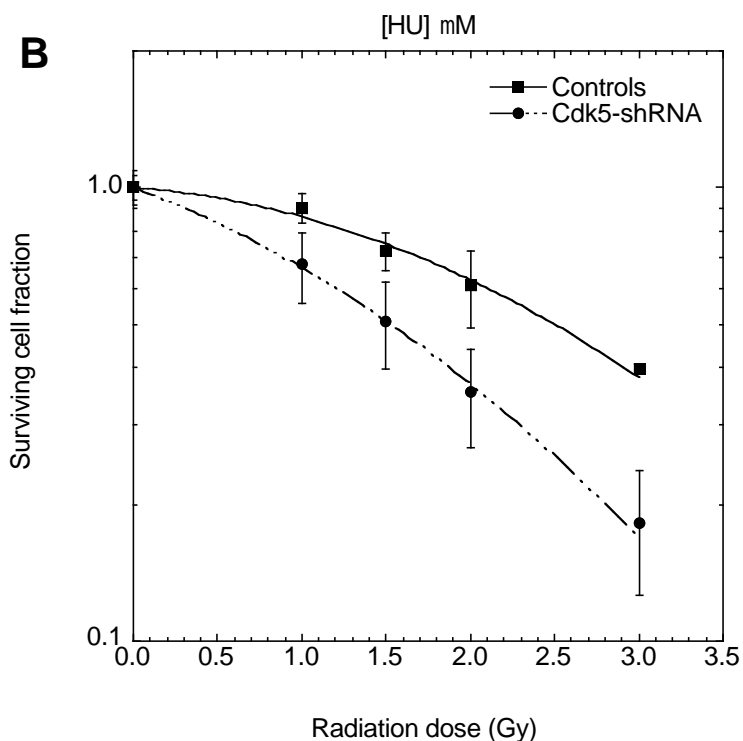

**Figure S1: Clonogenic cell survival of U2OS Control and Cdk5-shRNA1499 cell lines to increasing doses of (A) Hydroxyurea, (B)  $^{137}\text{Cs}$  gamma rays.**

**(A)** Asynchronous cells were exposed to increasing concentrations of HU present in the culture medium until colony fixation **(B)** Asynchronous cells were irradiated and colonies were allowed to grow for 10-15 days. Data represents mean  $\pm$  SD from two independent experiments in triplicate for all conditions.

**Figure S2**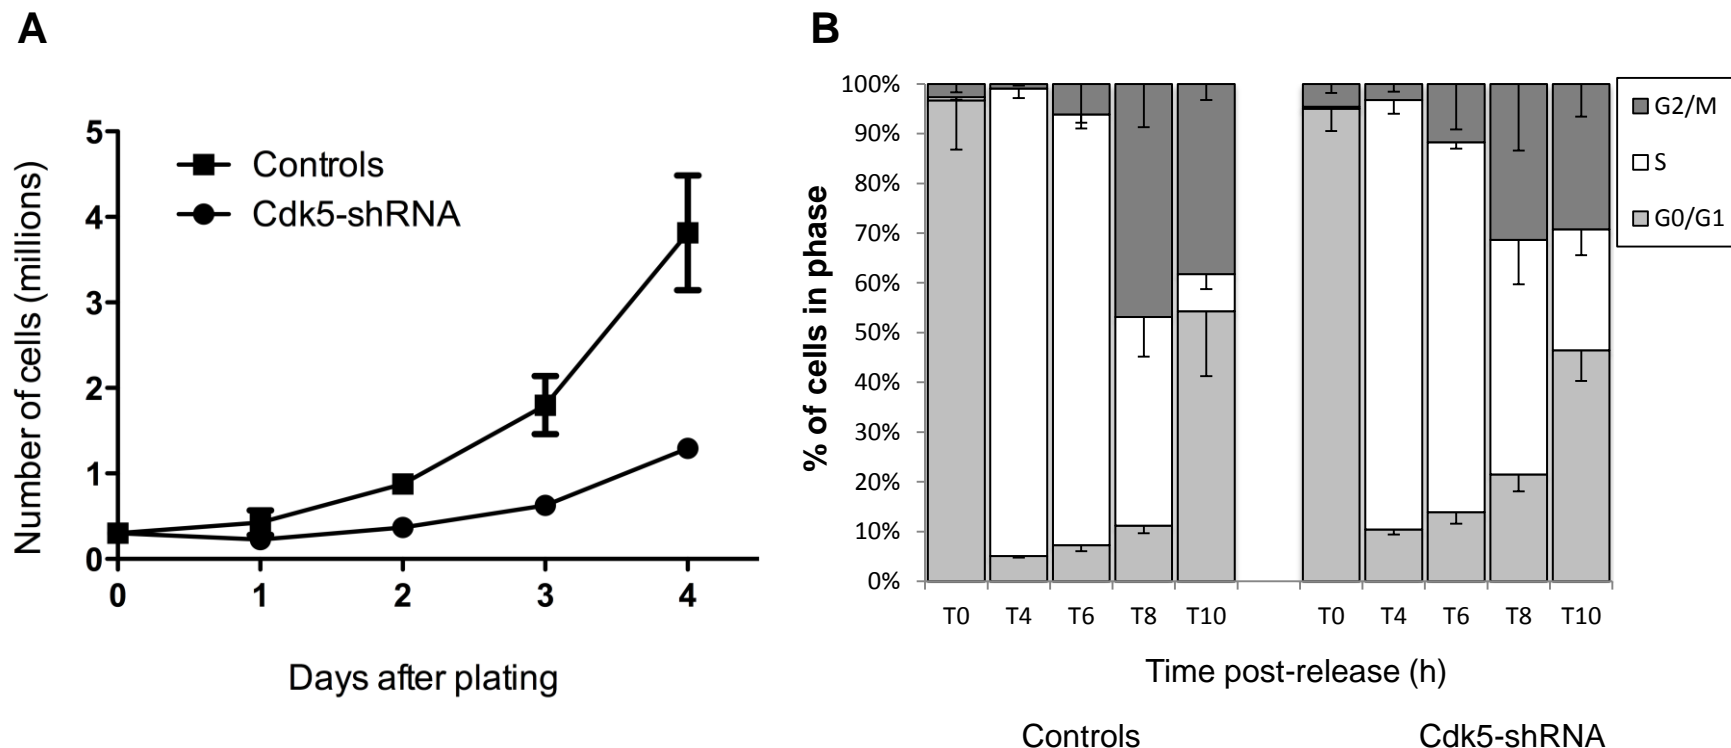**Fig S2: Reduced S-phase dynamics in the absence of the Cdk5 protein**

**(A)** Proliferation curves of Control and Cdk5-shRNA cells growing under normal growth conditions.  $3 \cdot 10^5$  cells were plated in 25 cm<sup>2</sup> flasks and 3 flasks per time point were counted at the indicated times.

**(B)** In order to determine the cell cycle progression and the length of S phase, cells were synchronized by a double thymidine block then pulsed labeled with BrdU (10  $\mu$ M/15 min) and analyzed by FACS at the indicated times. Data are mean  $\pm$  SD from 3 independent experiments.

**Figure S3**

**A**

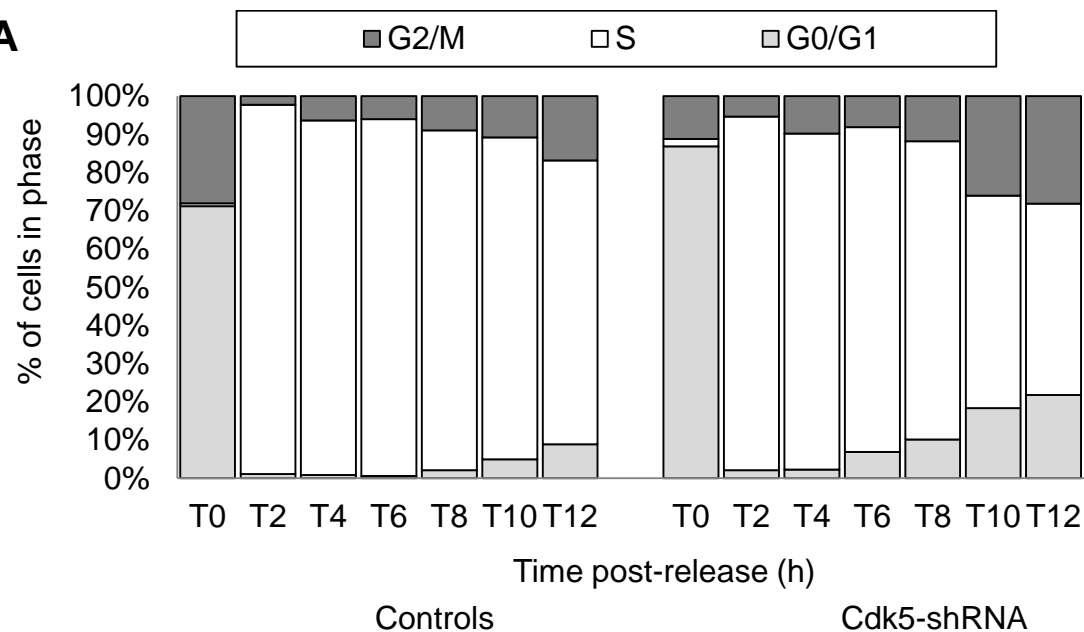

**C**

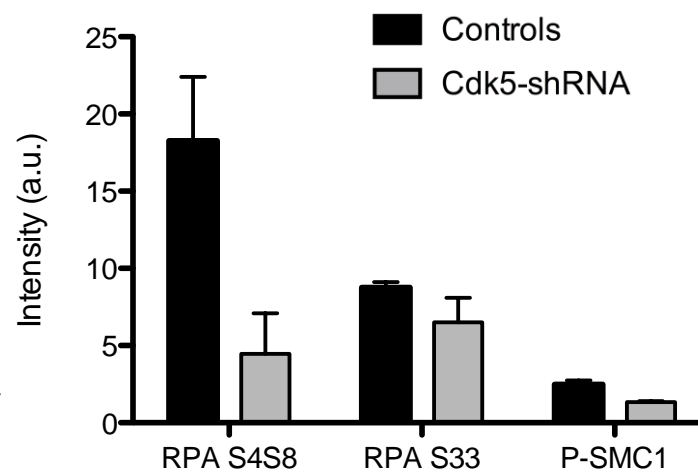

**B**

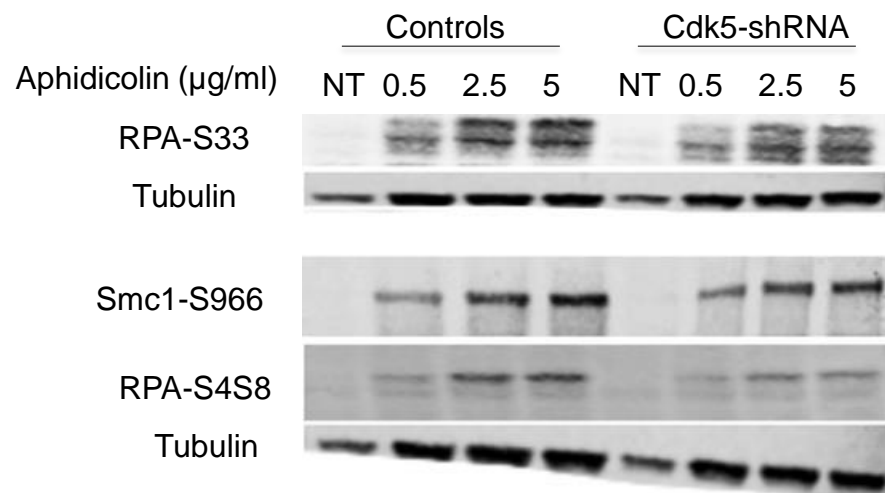

**D**

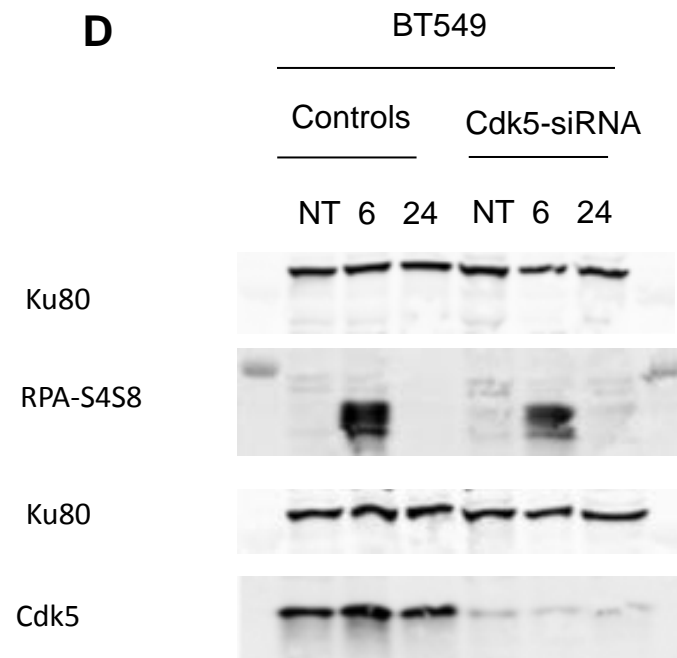

**Fig S3: Cdk5-shRNA cells show a faster progression through S and G2 after exposure to Aphidicolin and reduced phosphorylation of RPA32-S33 and S4S8**

**(A)** Cells were treated with Aphidicolin (4 $\mu$ g/ml) (Sigma) for 24 h, released into fresh medium (0 h corresponds to 24 h of Aphidicolin treatment) then pulse labelled with BrdU (10  $\mu$ M, 15 min) at different times post-release before collection. The percentage of Control and Cdk5-shRNA cells in G1, S and G2/M phases were determined by FACS analysis. Data presented is from one experiment. **(B)** Representative western blot analysis of phospho-SMC1 (S966), and phospho-RPA32 S4S8 and S33 in protein extracts from Control and Cdk5-shRNA cells treated for 24 h with 0.5/2.5/5  $\mu$ g/ml of Aphidicolin. Total Tubulin was used as a loading control. **(C)** Quantification data are ratios of intensities from treated (24 h /2.5  $\mu$ g/ml) vs non-treated cellular extracts, data are means  $\pm$  SD from 2 independent experiments. **(D)** Representative western-blot of total cellular extracts from Control and Cdk5-siRNA BT549 cells after HU treatment, the protein extraction was done 6 or 24h after exposure to 2mM of HU for 24h.



## Fig S4: Identification of RPA phosphorylation sites by mass spectrometry

Liquid chromatography-MS/MS spectra (MSA enabled) of RPA32 phosphopeptides containing **(A)** Ser23 (TQpSPGGFGSPAPSQAEK: 863.38<sup>(2+)</sup>*m/z*), **(B)** Ser29 (TQSPGGFGpSPAPSQAEK: 863.38<sup>(2+)</sup>*m/z*) and **(C)** Ser33 (TQSPGGFGSPAPpSQAEKK: 927.43<sup>(2+)</sup>*m/z*). The fragmentation spectra are trypsin/chymotrypsin derived peptides and show the peptide sequence based on the interpretation of the observed ions obtained. Tandem mass spectrum were labeled to show singly and doubly charged *b* and *y* ions, as well as ions corresponding to neutral losses of water ( $H_2O$ , circles °) and  $H_3PO_4$  (*P*, 98 Da) groups; *M*: parent ion mass are shown.

**(D)** Quantification of the phosphorylation of RPA32 at positions Ser29, Ser23 and Ser33. The bar charts represent the relative phosphorylation intensity of RPA32 by Cdk5, Cdk2 and Cdk1. Data are means  $\pm$  SD from four independent experiments.

**Figure S5**

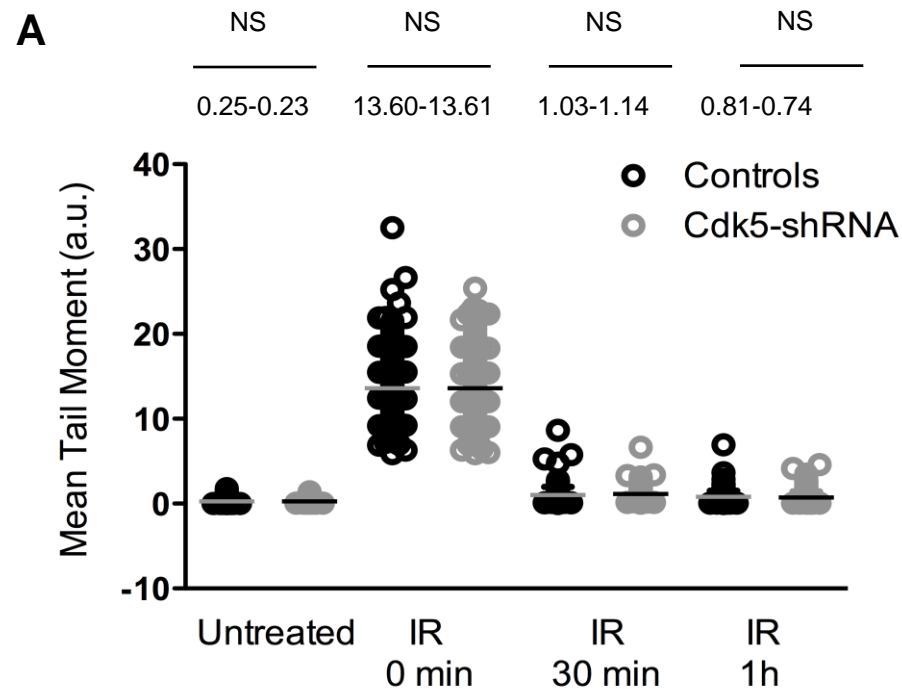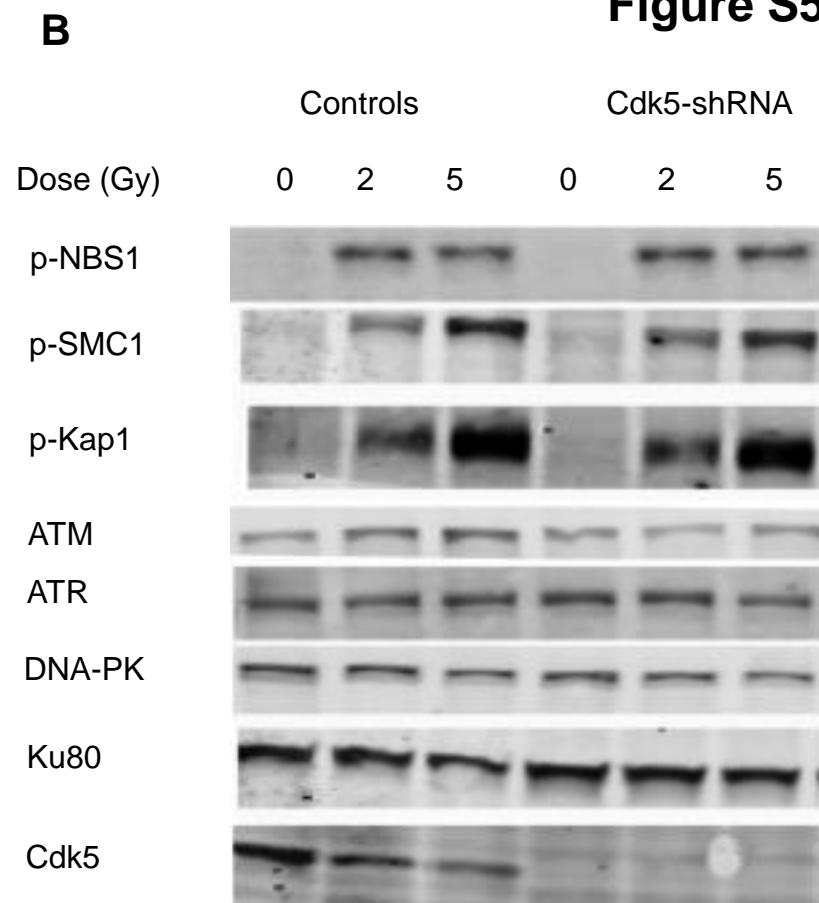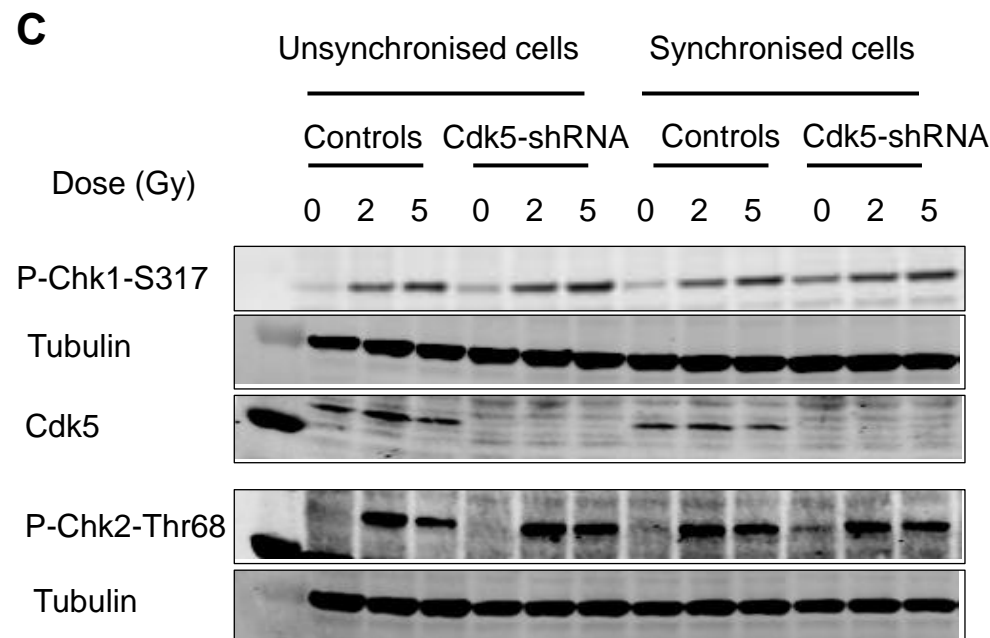

## **Fig S5: DNA damage response after irradiation in Cdk5-shRNA vs Control cells**

**(A)** DNA strand break formation and persistence measurement in the Cdk5-shRNA and Control cells using the alkaline Comet assay, immediately, 30 min and 1 h after exposure to gamma-rays (8 Gy) **(B)** Representative western-blot images of total cellular extracts from Control and Cdk5-shRNA HeLa cells unsynchronised after irradiation. Protein extraction was done 1h after exposure to 2 or 5 Gy of IR. Ku80 was used as a control for protein loading. **(C)** Representative western-blot images of total cellular extracts from Control and Cdk5-shRNA HeLa cells irradiated when synchronised in S-phase. Protein extraction was done 1h after exposure to 2 or 5 Gy of IR. Tubulin was used as a control for protein loading.

A

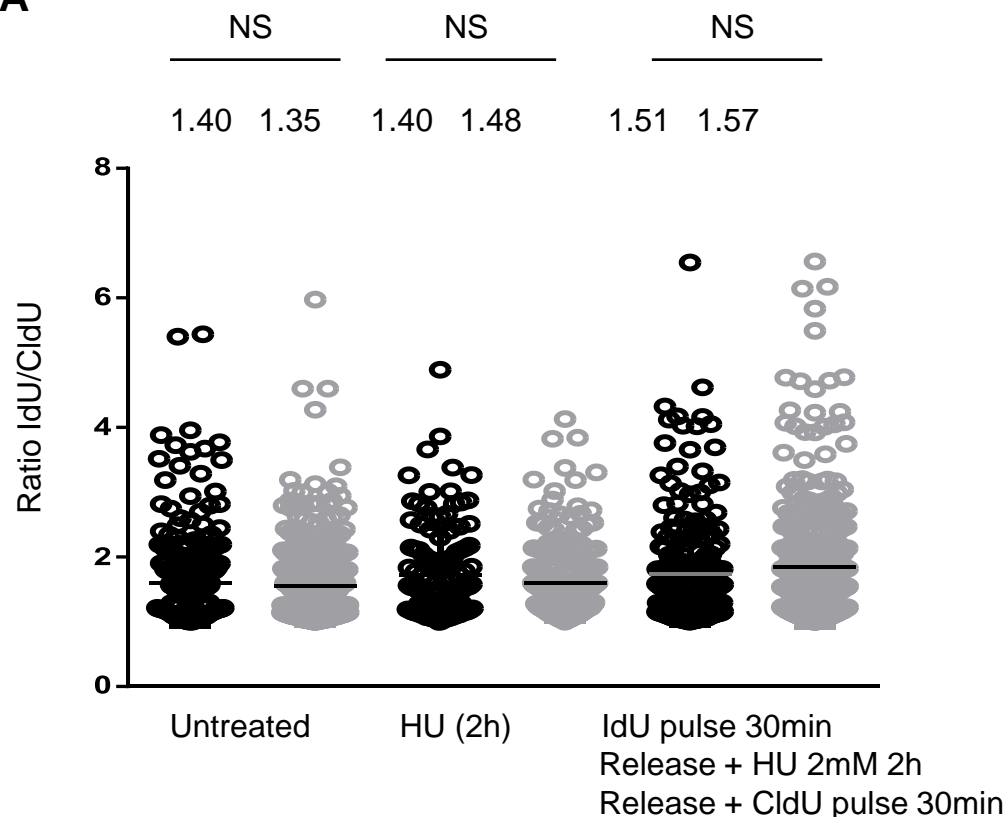

**Fig S6: Distribution of asymmetric replication bubbles in Control and Cdk5-shRNA cells**

The ratio of IdU/CldU was calculated for each replication fork. Distribution of ratios was analyzed as described previously<sup>1</sup> with no significant difference observed between the cells lines.

1. Techer H, Koundrioukoff S, Azar D, Wilhelm T, Carignon S, Brison O *et al.* Replication dynamics: biases and robustness of DNA fiber analysis. *J Mol Biol* 2013; 425: 4845-4855.

**Supplemental Table 1: Characteristics of the 456 breast cancer relative to mRNA over-expression of Cdk5.**

|                                              | Total population (%) | Number of patients (%)                        |                                               | <i>p</i> <sup>a</sup>   |
|----------------------------------------------|----------------------|-----------------------------------------------|-----------------------------------------------|-------------------------|
|                                              |                      | CdK5 mRNA expression ≤3.8 relative to normals | CdK5 mRNA expression >3.8 relative to normals |                         |
| <i>Total</i>                                 | 456 (100.0)          | 322 (70.6)                                    | 134 (29.4)                                    |                         |
| <i>Age</i>                                   |                      |                                               |                                               |                         |
| ≤50                                          | 98 (21.5)            | 65 (66.3)                                     | 33 (33.7)                                     | 0.29 (NS)               |
| >50                                          | 358 (78.5)           | 257 (71.8)                                    | 101 (28.2)                                    |                         |
| <i>SBR histological grade</i> <sup>b,c</sup> |                      |                                               |                                               |                         |
| I                                            | 58 (13)              | 45 (77.6)                                     | 13 (22.4)                                     | 0.21 (NS)               |
| II                                           | 229 (51.2)           | 165 (72.1)                                    | 64 (27.9)                                     |                         |
| III                                          | 160 (35.8)           | 106 (66.3)                                    | 54 (33.8)                                     |                         |
| <i>Lymph node status</i> <sup>d</sup>        |                      |                                               |                                               |                         |
| 0                                            | 119 (26.1)           | 73 (61.3)                                     | 46 (38.7)                                     | 0.024                   |
| 1-3                                          | 237 (52.1)           | 173 (73.0)                                    | 64 (27.0)                                     |                         |
| >3                                           | 99 (21.8)            | 76 (76.8)                                     | 23 (23.2)                                     |                         |
| <i>Macroscopic tumor size</i> <sup>e</sup>   |                      |                                               |                                               |                         |
| ≤25mm                                        | 223 (49.8)           | 167 (74.9)                                    | 56 (25.1)                                     | 0.070 (NS)              |
| >25mm                                        | 225 (50.2)           | 151 (67.1)                                    | 74 (32.9)                                     |                         |
| <i>ERα status</i> *                          |                      |                                               |                                               |                         |
| Negative                                     | 118 (25.9)           | 79 (66.9)                                     | 39 (33.1)                                     | 0.31 (NS)               |
| Positive                                     | 338 (74.1)           | 243 (71.9)                                    | 95 (28.1)                                     |                         |
| <i>PR status</i> *                           |                      |                                               |                                               |                         |
| Negative                                     | 194 (42.5)           | 130 (67.0)                                    | 64 (33.0)                                     | 0.15 (NS)               |
| Positive                                     | 262 (57.5)           | 192 (73.3)                                    | 70 (26.7)                                     |                         |
| <i>ERBB2 status</i> *                        |                      |                                               |                                               |                         |
| Negative                                     | 357 (78.3)           | 261 (73.1)                                    | 96 (26.9)                                     | 0.026                   |
| Positive                                     | 99 (21.7)            | 61 (61.6)                                     | 38 (38.4)                                     |                         |
| <i>Molecular subtypes</i>                    |                      |                                               |                                               |                         |
| RH- ERBB2-                                   | 68 (14.9)            | 44 (64.7)                                     | 24 (35.3)                                     | 0.032                   |
| RH- ERBB2+                                   | 45 (9.9)             | 30 (66.7)                                     | 15 (33.3)                                     |                         |
| RH+ ERBB2-                                   | 289 (63.4)           | 217 (75.1)                                    | 72 (24.9)                                     |                         |
| RH+ ERBB2+                                   | 54 (11.8)            | 31 (57.4)                                     | 23 (42.6)                                     |                         |
| <i>KI67 mRNA expression</i>                  |                      |                                               |                                               |                         |
| median                                       | 12.5 (0.80-117)      | 11.5 (0.85-77.8)                              | 17.2 (0.80-117)                               | 0.00000011 <sup>f</sup> |
| <i>Relapse</i>                               |                      |                                               |                                               |                         |
| No                                           | 287 (62.9)           | 213 (74.2)                                    | 74 (25.8)                                     | 0.028                   |
| Yes                                          | 169 (37.1)           | 109 (64.5)                                    | 60 (35.5)                                     |                         |

a  $\chi^2$ Test, b Scarff Bloom Richardson classification, c Information available for 447 patients, d Information available for 455 patients, e Information available for 448 patients, f Kruskal Wallis's H test, NS: non-significant, \* Estrogen receptor (ER), progesterone receptor (PR) and ERBB2 status was determined at the protein level by biochemical methods (dextran-coated charcoal method, enzymatic immuno-assay or immunohistochemistry) at the time of surgery and confirmed by *ERα*, *PR* and *ERBB2* real-time qRT-PCR assays<sup>1,2</sup>.

## Supplemental Table 2: Primers and RT-qPCR conditions and Cdk5 siRNA

### *Sequences for Cdk5 siRNA*

5' CAACAUCCCUGGUGAACGUTT 3'

3' TTGUUGUAGGGACCACUUGCA 5'

### *Sequences for primers RTqPCR*

Cdk5 - U: 5'-CAAGCTGCCAGACTATAAGCCCTA-3'

Cdk5 - L: 5'-TGCAGCAGATCCCTCCCTGT-3'

TBP - U:5'-TGCACAGGAGCCAAGAGTGAA-3'

TBP – L:5'CACATCACAGCTCCCCACCA-3'

### *PCR conditions*

95°C 10 min ; (95°C 15 sec 65°C 1 min) 50 cycles.

**Supplemental Table 3 : Details of antibodies**

| <b>Antibody</b>                              | <b>Supplier</b>              |
|----------------------------------------------|------------------------------|
| Cdk5 (Py15)                                  | Epitomics (1947-S)           |
| RPA 34 (9H8)                                 | Pierce (MA1-26418)           |
| p.RPA S33                                    | Bethyl (A300-246A)           |
| p.RPA S4S8                                   | Bethyl (A300-245A)           |
| p.Chk1 317                                   | Bethyl (A300-163A)           |
| <b>p.Chk2 T68</b>                            | <b>Cell Signaling (2661)</b> |
| Rad51 (H-92)                                 | Santa Cruz (SC-8349)         |
| <b>Phospho-p95/NBS1 (Ser343)</b>             | <b>Cell Signaling (3001)</b> |
| <b>p.KAP1 S824</b>                           | <b>Abcam (ab70369)</b>       |
| <b>ATR Antibody (N-19)</b>                   | <b>Santa Cruz (sc-1887)</b>  |
| <b>ATM</b>                                   | <b>Novus (NB100-104)</b>     |
| <b>DNA-PK</b>                                | <b>BioLegend (612701)</b>    |
| <b>KU80</b>                                  | <b>Abcam (ab87860)</b>       |
| H2AX (Ser139) FITC conjugated                | Euromedex (16-202A)          |
| p.SMC1 S966                                  | Bethyl (A300-050A)           |
| ssDNA                                        | Milipore (MAB3034)           |
| BrdU (Monoclonal Antibody) Rat Clone: BU1/75 | Ab Serotec (OBT0030)         |
| Anti-BrdU FITC (clone B44)                   | BD Bioscience (347583)       |

**Supplementary References**

- 1 Bieche I, Onody P, Laurendeau I, Olivi M, Vidaud D, Lidereau R *et al.* Real-time reverse transcription-PCR assay for future management of ERBB2-based clinical applications. *Clinical chemistry* 1999; 45: 1148-1156.
- 2 Bieche I, Parfait B, Le Doussal V, Olivi M, Rio MC, Lidereau R *et al.* Identification of CGA as a novel estrogen receptor-responsive gene in breast cancer: an outstanding candidate marker to predict the response to endocrine therapy. *Cancer Res* 2001; 61: 1652-1658.

## Supplementary Experimental Procedures

### Mass Spectrometry Analyses

After incubation of RPA32 with Cdk5, proteins were separated on SDS–PAGE gels stained with LabSafe GEL Blue Stain (G-Biosciences) and the RPA bands excised. Gel slices were washed and proteins reduced with 10 mM dithiothreitol prior to alkylation with 55 mM iodoacetamide. After washing and shrinking the gel pieces with 100% acetonitrile (MeCN), an in-gel digestion was performed using trypsin (Promega) and adding Chymotrypsin (Sequencing Grade, Promega) after 1 h in 25 mM  $\text{NH}_4\text{HCO}_3$  at 37°C and continuing the digest for another 4 additional hours. The extracted peptides were analysed by nano-liquid chromatography tandem mass spectrometry using an Ultimate 3000 system (Dionex S.A.) coupled to an LTQ-Orbitrap XL mass spectrometer (Thermo Fisher Scientific). Samples were loaded onto a C18 precolumn (300  $\mu\text{m}$  inner diameter x 5 mm; Dionex) at 20  $\mu\text{l}/\text{min}$  in 2% MeCN, 0.1% trifluoroacetic acid. After 3 min of desalting, the precolumn was switched with the analytical C18 column (75  $\mu\text{m}$  i.d. x 50 cm, packed with C18 PepMap™, 3  $\mu\text{m}$ , 100 Å; LC Packings) equilibrated in solvent A (2% MeCN, 0.1%  $\text{HCO}_2\text{H}$ ). Bound peptides were eluted using a two-step linear gradient of 157 min (from 0 to 30%) and 20 min (from 30 to 50%) of solvent B (80% MeCN, 0.085%  $\text{HCO}_2\text{H}$ ) at a 150 nl/min flow rate and an oven temperature of 40°C. A LTQ-Orbitrap mass spectrometer was used in the positive ion mode and Survey MS scans acquired in the Orbitrap on the 350-1000 m/z range with the resolution set to a value of 100,000. We recalibrated each scan in real time by co-injecting an internal standard from ambient air into the C-trap. We selected the five most intense ions per survey scan for collision induced fragmentation and analyzed the resulting fragments in the linear trap (LTQ) and, if a neutral loss of 98 Da from the precursor ion was observed, then we enabled a multistage activation (MSA). Target ions already selected for MS/MS were dynamically excluded for 30 s. We acquired data using the Xcalibur software (v 2.2) and the resulting spectra were interrogated by Mascot™ and SEQUEST® through Proteome Discoverer (v 1.4, Thermo Scientific) with the SwissProt Homo sapiens database. We set carbamidomethylation of Cys, oxidation of Met, N-terminal acetylation, phosphorylation of Ser and phosphorylation of Thr as variable modifications for all searches. We set specificity of trypsin and chymotrypsin digestion and allowed two missed cleavage sites and we set the mass tolerances in MS and MS/MS to 2 ppm and 0.5 Da, respectively. The resulting Mascot and Sequest files were further processed using myProMS<sup>1</sup>. We validated phosphorylated peptides by combining phosphoRS analysis and by manually inspecting the peak assignment. The same procedure was used to analyse the phosphorylation of RPA32 by Cdk1 and Cdk2.

### Label-free Quantification

To quantify the phosphorylated peptides, we extracted from the MS survey of nano-LC-MS/MS raw files the extracted ion chromatogram (XIC) signal of the well characterized tryptic peptide ions using the Pinpoint™ (version: 1.2, Thermo Scientific) software. We integrated XIC areas in Xcalibur under the QualBrowser interface using the ICIS algorithm. We calculated Mean values of normalized areas by using the total RPA 32 kDa signal (all RPA 32 kDa peptide ions). We calculated mean values and S.D. for four replicate measurements of independent experiments.

1. Pouillet P, Carpentier S, Barillot E. myProMS, a web server for management and validation of mass spectrometry-based proteomic data. *Proteomics* 2007; 7: 2553-2556.
